# Supplementary material
Source: Research Square preprint supplement (doi:10.21203/rs.3.rs-9746084/v1)
Supplement: Supplementary file 1 [file 1840bb555c032149d2e6ddb1.xlsx]

## Sheet: Hourly demand weights
Hour band	Tier 1	Tier 2	Tier 3	Tier 4	Tier 5		a_h (Tier 1)	a_h (Tier 2)	a_h (Tier 3)	a_h (Tier 4)	a_h (Tier 5)
00:00-01:00	0	0	0	0	0.0142857		0	0	0	0	1
01:00-02:00	0	0	0	0	0.0142857		0	0	0	0	0
02:00-03:00	0	0	0	0	0.0142857		0	0	0	0	0
03:00-04:00	0	0	0	0	0.0142857		0	0	0	0	1
04:00-05:00	0	0	0	0	0.0142857		0	0	0	0	1
05:00-06:00	0	0	0	0	0.0142857		0	0	0	0	1
06:00-07:00	0	0	0.017451	0.017451	0.04		0	0	0	0	1
07:00-08:00	0	0	0.017451	0.017451	0.04		0	0	0	0	1
08:00-09:00	0	0	0.017451	0.017451	0.04		0	0	0	0	1
09:00-10:00	0	0	0.017451	0.017451	0.0266667		0	0	0	1	1
10:00-11:00	0	0	0.017451	0.017451	0.0266667		0	0	0	1	1
11:00-12:00	0	0	0.017451	0.017451	0.0266667		0	0	0	1	1
12:00-13:00	0.0378788	0.0378788	0.0457843	0.0457843	0.04		0	0	0	1	1
13:00-14:00	0.0378788	0.0378788	0.0457843	0.0457843	0.04		0	0	1	1	1
14:00-15:00	0.0378788	0.0378788	0.0457843	0.0457843	0.05		0	0	1	1	1
15:00-16:00	0.0378788	0.0378788	0.0457843	0.0457843	0.05		0	0	1	1	1
16:00-17:00	0.0378788	0.0378788	0.0457843	0.0457843	0.05		0	1	1	1	1
17:00-18:00	0.0378788	0.0378788	0.0457843	0.0457843	0.05		0	1	1	1	1
18:00-19:00	0.179545	0.179545	0.141618	0.141618	0.0875		1	1	1	1	1
19:00-20:00	0.179545	0.179545	0.141618	0.141618	0.0875		1	1	1	1	1
20:00-21:00	0.179545	0.179545	0.141618	0.141618	0.0875		1	1	1	1	1
21:00-22:00	0.179545	0.179545	0.141618	0.141618	0.0875		1	1	1	1	1
22:00-23:00	0.0545455	0.0545455	0.0541176	0.0541176	0.07		0	0	1	1	1
23:00-00:00	0	0	0	0	0.0142857		0	0	1	1	1
Sum	1	1	1	1	1
						Ψ_x = Σ(w·a)	0.718182	0.793939	0.84951	0.947647	0.971429
Check Σw	1	1	1	1	1

## Sheet: Tier 1
P_x (Wh/day)	12
a_x (hours/day)	4
r_x (hours/day)	1
R_x = μ * (r_x / a_x)
AE = P_x * (1 - R_x) * D^n
μ = reliability coefficient (0.9–0.5)
D = annual degradation factor (0.9–0.5)
n = system age in years (1–5)
Weighting assumption: highest weight between 6:30pm and 10:30pm (4 hours)
AE^(w) uses ψ_x computed from weights: AE^(w) = P_x * ψ_x * (1 - R_x) * D^n												0.281818
μ=	0.9	AE						AEw
Year (n)	D=	0.9	0.8	0.7	0.6	0.5		0.9	0.8	0.7	0.6	0.5
0		9.3	9.3	9.3	9.3	9.3		6.67909	6.67909	6.67909	6.67909	6.67909
1		8.37	7.44	6.51	5.58	4.65		6.01118	5.34327	4.67536	4.00745	3.33955
2		7.533	5.952	4.557	3.348	2.325		5.41006	4.27462	3.27275	2.40447	1.66977
3		6.7797	4.7616	3.1899	2.0088	1.1625		4.86906	3.41969	2.29093	1.44268	0.834886
4		6.10173	3.80928	2.23293	1.20528	0.58125		4.38215	2.73576	1.60365	0.86561	0.417443
5		5.49156	3.04742	1.56305	0.723168	0.290625		3.94394	2.1886	1.12255	0.519366	0.208722
μ=	0.8	AE						AEw
Year (n)	D=	0.9	0.8	0.7	0.6	0.5		0.9	0.8	0.7	0.6	0.5
0		9.6	9.6	9.6	9.6	9.6		6.89455	6.89455	6.89455	6.89455	6.89455
1		8.64	7.68	6.72	5.76	4.8		6.20509	5.51564	4.82618	4.13673	3.44727
2		7.776	6.144	4.704	3.456	2.4		5.58458	4.41251	3.37833	2.48204	1.72364
3		6.9984	4.9152	3.2928	2.0736	1.2		5.02612	3.53001	2.36483	1.48922	0.861818
4		6.29856	3.93216	2.30496	1.24416	0.6		4.52351	2.82401	1.65538	0.893533	0.430909
5		5.6687	3.14573	1.61347	0.746496	0.3		4.07116	2.2592	1.15877	0.53612	0.215455
μ=	0.7	AE						AEw
Year (n)	D=	0.9	0.8	0.7	0.6	0.5		0.9	0.8	0.7	0.6	0.5
0		9.9	9.9	9.9	9.9	9.9		7.11	7.11	7.11	7.11	7.11
1		8.91	7.92	6.93	5.94	4.95		6.399	5.688	4.977	4.266	3.555
2		8.019	6.336	4.851	3.564	2.475		5.7591	4.5504	3.4839	2.5596	1.7775
3		7.2171	5.0688	3.3957	2.1384	1.2375		5.18319	3.64032	2.43873	1.53576	0.88875
4		6.49539	4.05504	2.37699	1.28304	0.61875		4.66487	2.91226	1.70711	0.921456	0.444375
5		5.84585	3.24403	1.66389	0.769824	0.309375		4.19838	2.3298	1.19498	0.552874	0.222187
μ=	0.6	AE						AEw
Year (n)	D=	0.9	0.8	0.7	0.6	0.5		0.9	0.8	0.7	0.6	0.5
0		10.2	10.2	10.2	10.2	10.2		7.32545	7.32545	7.32545	7.32545	7.32545
1		9.18	8.16	7.14	6.12	5.1		6.59291	5.86036	5.12782	4.39527	3.66273
2		8.262	6.528	4.998	3.672	2.55		5.93362	4.68829	3.58947	2.63716	1.83136
3		7.4358	5.2224	3.4986	2.2032	1.275		5.34026	3.75063	2.51263	1.5823	0.915682
4		6.69222	4.17792	2.44902	1.32192	0.6375		4.80623	3.00051	1.75884	0.949379	0.457841
5		6.023	3.34234	1.71431	0.793152	0.31875		4.32561	2.4004	1.23119	0.569627	0.22892
μ	0.5	AE						AEw
Year (n)	D=	0.9	0.8	0.7	0.6	0.5		0.9	0.8	0.7	0.6	0.5
0		10.5	10.5	10.5	10.5	10.5		7.54091	7.54091	7.54091	7.54091	7.54091
1		9.45	8.4	7.35	6.3	5.25		6.78682	6.03273	5.27864	4.52455	3.77045
2		8.505	6.72	5.145	3.78	2.625		6.10814	4.82618	3.69505	2.71473	1.88523
3		7.6545	5.376	3.6015	2.268	1.3125		5.49732	3.86095	2.58653	1.62884	0.942614
4		6.88905	4.3008	2.52105	1.3608	0.65625		4.94759	3.08876	1.81057	0.977302	0.471307
5		6.20015	3.44064	1.76473	0.81648	0.328125		4.45283	2.47101	1.2674	0.586381	0.235653
μ=	0.4	AE						AEw
Year (n)	D=	0.9	0.8	0.7	0.6	0.5		0.9	0.8	0.7	0.6	0.5
0		10.8	10.8	10.8	10.8	10.8		7.75636	7.75636	7.75636	7.75636	7.75636
1		9.72	8.64	7.56	6.48	5.4		6.98073	6.20509	5.42945	4.65382	3.87818
2		8.748	6.912	5.292	3.888	2.7		6.28265	4.96407	3.80062	2.79229	1.93909
3		7.8732	5.5296	3.7044	2.3328	1.35		5.65439	3.97126	2.66043	1.67537	0.969545
4		7.08588	4.42368	2.59308	1.39968	0.675		5.08895	3.17701	1.8623	1.00522	0.484773
5		6.37729	3.53894	1.81516	0.839808	0.3375		4.58006	2.54161	1.30361	0.603135	0.242386
μ=	0.3	AE						AEw
Year (n)	D=	0.9	0.8	0.7	0.6	0.5		0.9	0.8	0.7	0.6	0.5
0		11.1	11.1	11.1	11.1	11.1		7.97182	7.97182	7.97182	7.97182	7.97182
1		9.99	8.88	7.77	6.66	5.55		7.17464	6.37745	5.58027	4.78309	3.98591
2		8.991	7.104	5.439	3.996	2.775		6.45717	5.10196	3.90619	2.86985	1.99295
3		8.0919	5.6832	3.8073	2.3976	1.3875		5.81146	4.08157	2.73433	1.72191	0.996477
4		7.28271	4.54656	2.66511	1.43856	0.69375		5.23031	3.26526	1.91403	1.03315	0.498239
5		6.55444	3.63725	1.86558	0.863136	0.346875		4.70728	2.61221	1.33982	0.619889	0.249119
μ=	0.2	AE						AEw
Year (n)	D=	0.9	0.8	0.7	0.6	0.5		0.9	0.8	0.7	0.6	0.5
0		11.4	11.4	11.4	11.4	11.4		8.18727	8.18727	8.18727	8.18727	8.18727
1		10.26	9.12	7.98	6.84	5.7		7.36855	6.54982	5.73109	4.91236	4.09364
2		9.234	7.296	5.586	4.104	2.85		6.63169	5.23985	4.01176	2.94742	2.04682
3		8.3106	5.8368	3.9102	2.4624	1.425		5.96852	4.19188	2.80823	1.76845	1.02341
4		7.47954	4.66944	2.73714	1.47744	0.7125		5.37167	3.35351	1.96576	1.06107	0.511705
5		6.73159	3.73555	1.916	0.886464	0.35625		4.8345	2.68281	1.37603	0.636642	0.255852
μ=	0.1	AE						AEw
Year (n)	D=	0.9	0.8	0.7	0.6	0.5		0.9	0.8	0.7	0.6	0.5
0		11.7	11.7	11.7	11.7	11.7		8.40273	8.40273	8.40273	8.40273	8.40273
1		10.53	9.36	8.19	7.02	5.85		7.56245	6.72218	5.88191	5.04164	4.20136
2		9.477	7.488	5.733	4.212	2.925		6.80621	5.37775	4.11734	3.02498	2.10068
3		8.5293	5.9904	4.0131	2.5272	1.4625		6.12559	4.3022	2.88214	1.81499	1.05034
4		7.67637	4.79232	2.80917	1.51632	0.73125		5.51303	3.44176	2.01749	1.08899	0.52517
5		6.90873	3.83386	1.96642	0.909792	0.365625		4.96173	2.75341	1.41225	0.653396	0.262585

## Sheet: Tier 2
P_x (Wh/day)	50
a_x (hours/day)	4
r_x (hours/day)	1
R_x = μ * (r_x / a_x)
AE = P_x * (1 - R_x) * D^n
μ = reliability coefficient (0.9–0.5)
D = annual degradation factor (0.9–0.5)
n = system age in years (1–5)
Weighting assumption: highest weight between 6:30pm and 10:30pm (4 hours)
AE^(w) uses ψ_x computed from weights: AE^(w) = P_x * ψ_x * (1 - R_x) * D^n												0.206061
μ=	0.9	AE						AEw
Year (n)	D=	0.9	0.8	0.7	0.6	0.5		0.9	0.8	0.7	0.6	0.5
0		38.75	38.75	38.75	38.75	38.75		30.7652	30.7652	30.7652	30.7652	30.7652
1		34.875	31	27.125	23.25	19.375		27.6886	24.6121	21.5356	18.4591	15.3826
2		31.3875	24.8	18.9875	13.95	9.6875		24.9198	19.6897	15.0749	11.0755	7.69129
3		28.2488	19.84	13.2912	8.37	4.84375		22.4278	15.7518	10.5524	6.64527	3.84564
4		25.4239	15.872	9.30387	5.022	2.42188		20.185	12.6014	7.38671	3.98716	1.92282
5		22.8815	12.6976	6.51271	3.0132	1.21094		18.1665	10.0811	5.1707	2.3923	0.961411
μ=	0.8	AE						AEw	AE^(w)
Year (n)	D=	0.9	0.8	0.7	0.6	0.5		0.9	0.8	0.7	0.6	0.5
0		40	40	40	40	40		31.7576	31.7576	31.7576	31.7576	31.7576
1		36	32	28	24	20		28.5818	25.4061	22.2303	19.0545	15.8788
2		32.4	25.6	19.6	14.4	10		25.7236	20.3248	15.5612	11.4327	7.93939
3		29.16	20.48	13.72	8.64	5		23.1513	16.2599	10.8928	6.85964	3.9697
4		26.244	16.384	9.604	5.184	2.5		20.8361	13.0079	7.62499	4.11578	1.98485
5		23.6196	13.1072	6.7228	3.1104	1.25		18.7525	10.4063	5.3375	2.46947	0.992424
μ=	0.7	AE						AEw	AE^(w)
Year (n)	D=	0.9	0.8	0.7	0.6	0.5		0.9	0.8	0.7	0.6	0.5
0		41.25	41.25	41.25	41.25	41.25		32.75	32.75	32.75	32.75	32.75
1		37.125	33	28.875	24.75	20.625		29.475	26.2	22.925	19.65	16.375
2		33.4125	26.4	20.2125	14.85	10.3125		26.5275	20.96	16.0475	11.79	8.1875
3		30.0713	21.12	14.1487	8.91	5.15625		23.8747	16.768	11.2332	7.074	4.09375
4		27.0641	16.896	9.90412	5.346	2.57812		21.4873	13.4144	7.86327	4.2444	2.04687
5		24.3577	13.5168	6.93289	3.2076	1.28906		19.3385	10.7315	5.50429	2.54664	1.02344
μ=	0.6	AE						AEw	AE^(w)
Year (n)	D=	0.9	0.8	0.7	0.6	0.5		0.9	0.8	0.7	0.6	0.5
0		42.5	42.5	42.5	42.5	42.5		33.7424	33.7424	33.7424	33.7424	33.7424
1		38.25	34	29.75	25.5	21.25		30.3682	26.9939	23.6197	20.2455	16.8712
2		34.425	27.2	20.825	15.3	10.625		27.3314	21.5952	16.5338	12.1473	8.43561
3		30.9825	21.76	14.5775	9.18	5.3125		24.5982	17.2761	11.5737	7.28836	4.2178
4		27.8843	17.408	10.2042	5.508	2.65625		22.1384	13.8209	8.10156	4.37302	2.1089
5		25.0958	13.9264	7.14297	3.3048	1.32812		19.9246	11.0567	5.67109	2.62381	1.05445
μ=	0.5	AE						AEw	AE^(w)
Year (n)	D=	0.9	0.8	0.7	0.6	0.5		0.9	0.8	0.7	0.6	0.5
0		43.75	43.75	43.75	43.75	43.75		34.7348	34.7348	34.7348	34.7348	34.7348
1		39.375	35	30.625	26.25	21.875		31.2614	27.7879	24.3144	20.8409	17.3674
2		35.4375	28	21.4375	15.75	10.9375		28.1352	22.2303	17.0201	12.5045	8.68371
3		31.8938	22.4	15.0062	9.45	5.46875		25.3217	17.7842	11.9141	7.50273	4.34186
4		28.7044	17.92	10.5044	5.67	2.73438		22.7895	14.2274	8.33984	4.50164	2.17093
5		25.8339	14.336	7.35306	3.402	1.36719		20.5106	11.3819	5.83789	2.70098	1.08546
μ=	0.4	AE						AEw	AE^(w)
Year (n)	D=	0.9	0.8	0.7	0.6	0.5		0.9	0.8	0.7	0.6	0.5
0		45	45	45	45	45		35.7273	35.7273	35.7273	35.7273	35.7273
1		40.5	36	31.5	27	22.5		32.1545	28.5818	25.0091	21.4364	17.8636
2		36.45	28.8	22.05	16.2	11.25		28.9391	22.8655	17.5064	12.8618	8.93182
3		32.805	23.04	15.435	9.72	5.625		26.0452	18.2924	12.2545	7.71709	4.46591
4		29.5245	18.432	10.8045	5.832	2.8125		23.4407	14.6339	8.57812	4.63025	2.23295
5		26.5721	14.7456	7.56315	3.4992	1.40625		21.0966	11.7071	6.00468	2.77815	1.11648
μ=	0.3	AE						AEw	AE^(w)
Year (n)	D=	0.9	0.8	0.7	0.6	0.5		0.9	0.8	0.7	0.6	0.5
0		46.25	46.25	46.25	46.25	46.25		36.7197	36.7197	36.7197	36.7197	36.7197
1		41.625	37	32.375	27.75	23.125		33.0477	29.3758	25.7038	22.0318	18.3598
2		37.4625	29.6	22.6625	16.65	11.5625		29.743	23.5006	17.9927	13.2191	9.17992
3		33.7163	23.68	15.8637	9.99	5.78125		26.7687	18.8005	12.5949	7.93145	4.58996
4		30.3446	18.944	11.1046	5.994	2.89062		24.0918	15.0404	8.8164	4.75887	2.29498
5		27.3102	15.1552	7.77324	3.5964	1.44531		21.6826	12.0323	6.17148	2.85532	1.14749
μ=	0.2	AE						AEw	AE^(w)
Year (n)	D=	0.9	0.8	0.7	0.6	0.5		0.9	0.8	0.7	0.6	0.5
0		47.5	47.5	47.5	47.5	47.5		37.7121	37.7121	37.7121	37.7121	37.7121
1		42.75	38	33.25	28.5	23.75		33.9409	30.1697	26.3985	22.6273	18.8561
2		38.475	30.4	23.275	17.1	11.875		30.5468	24.1358	18.4789	13.5764	9.42803
3		34.6275	24.32	16.2925	10.26	5.9375		27.4921	19.3086	12.9353	8.14582	4.71402
4		31.1648	19.456	11.4047	6.156	2.96875		24.7429	15.4469	9.05468	4.88749	2.35701
5		28.0483	15.5648	7.98332	3.6936	1.48438		22.2686	12.3575	6.33828	2.93249	1.1785
μ=	0.1	AE						AEw	AE^(w)
Year (n)	D=	0.9	0.8	0.7	0.6	0.5		0.9	0.8	0.7	0.6	0.5
0		48.75	48.75	48.75	48.75	48.75		38.7045	38.7045	38.7045	38.7045	38.7045
1		43.875	39	34.125	29.25	24.375		34.8341	30.9636	27.0932	23.2227	19.3523
2		39.4875	31.2	23.8875	17.55	12.1875		31.3507	24.7709	18.9652	13.9336	9.67614
3		35.5388	24.96	16.7212	10.53	6.09375		28.2156	19.8167	13.2757	8.36018	4.83807
4		31.9849	19.968	11.7049	6.318	3.04688		25.3941	15.8534	9.29296	5.01611	2.41903
5		28.7864	15.9744	8.19341	3.7908	1.52344		22.8546	12.6827	6.50507	3.00967	1.20952

## Sheet: Tier 3
P_x (Wh/day)	200
a_x (hours/day)	8
r_x (hours/day)	1
R_x = μ * (r_x / a_x)
AE = P_x * (1 - R_x) * D^n
μ = reliability coefficient (0.9–0.5)
D = annual degradation factor (0.9–0.5)
n = system age in years (1–5)
Weighting assumption: highest weight between 6:30pm and 10:30pm (4 hours)
AE^(w) uses ψ_x computed from weights: AE^(w) = P_x * ψ_x * (1 - R_x) * D^n												0.15049
μ=	0.9	AE						AEw
Year (n)	D=	0.9	0.8	0.7	0.6	0.5		0.9	0.8	0.7	0.6	0.5
0		177.5	177.5	177.5	177.5	177.5		150.788	150.788	150.788	150.788	150.788
1		159.75	142	124.25	106.5	88.75		135.709	120.63	105.552	90.4728	75.394
2		143.775	113.6	86.975	63.9	44.375		122.138	96.5043	73.8861	54.2837	37.697
3		129.398	90.88	60.8825	38.34	22.1875		109.924	77.2035	51.7203	32.5702	18.8485
4		116.458	72.704	42.6177	23.004	11.0938		98.932	61.7628	36.2042	19.5421	9.42425
5		104.812	58.1632	29.8324	13.8024	5.54688		89.0388	49.4102	25.3429	11.7253	4.71212
μ=	0.8	AE						AEw
Year (n)	D=	0.9	0.8	0.7	0.6	0.5		0.9	0.8	0.7	0.6	0.5
0		180	180	180	180	180		152.912	152.912	152.912	152.912	152.912
1		162	144	126	108	90		137.621	122.329	107.038	91.7471	76.4559
2		145.8	115.2	88.2	64.8	45		123.859	97.8635	74.9268	55.0482	38.2279
3		131.22	92.16	61.74	38.88	22.5		111.473	78.2908	52.4487	33.0289	19.114
4		118.098	73.728	43.218	23.328	11.25		100.325	62.6327	36.7141	19.8174	9.55699
5		106.288	58.9824	30.2526	13.9968	5.625		90.2929	50.1061	25.6999	11.8904	4.77849
μ=	0.7	AE						AEw
Year (n)	D=	0.9	0.8	0.7	0.6	0.5		0.9	0.8	0.7	0.6	0.5
0		182.5	182.5	182.5	182.5	182.5		155.036	155.036	155.036	155.036	155.036
1		164.25	146	127.75	109.5	91.25		139.532	124.028	108.525	93.0213	77.5178
2		147.825	116.8	89.425	65.7	45.625		125.579	99.2227	75.9674	55.8128	38.7589
3		133.043	93.44	62.5975	39.42	22.8125		113.021	79.3782	53.1772	33.4877	19.3794
4		119.738	74.752	43.8182	23.652	11.4062		101.719	63.5026	37.224	20.0926	9.68972
5		107.764	59.8016	30.6728	14.1912	5.70312		91.5469	50.802	26.0568	12.0556	4.84486
μ=	0.6	AE						AEw
Year (n)	D=	0.9	0.8	0.7	0.6	0.5		0.9	0.8	0.7	0.6	0.5
0		185	185	185	185	185		157.159	157.159	157.159	157.159	157.159
1		166.5	148	129.5	111	92.5		141.443	125.727	110.012	94.2956	78.5797
2		149.85	118.4	90.65	66.6	46.25		127.299	100.582	77.0081	56.5774	39.2898
3		134.865	94.72	63.455	39.96	23.125		114.569	80.4656	53.9056	33.9464	19.6449
4		121.379	75.776	44.4185	23.976	11.5625		103.112	64.3725	37.734	20.3678	9.82246
5		109.241	60.6208	31.0929	14.3856	5.78125		92.801	51.498	26.4138	12.2207	4.91123
μ=	0.5	AE						AEw
Year (n)	D=	0.9	0.8	0.7	0.6	0.5		0.9	0.8	0.7	0.6	0.5
0		187.5	187.5	187.5	187.5	187.5		159.283	159.283	159.283	159.283	159.283
1		168.75	150	131.25	112.5	93.75		143.355	127.426	111.498	95.5699	79.6415
2		151.875	120	91.875	67.5	46.875		129.019	101.941	78.0487	57.3419	39.8208
3		136.688	96	64.3125	40.5	23.4375		116.117	81.5529	54.6341	34.4051	19.9104
4		123.019	76.8	45.0187	24.3	11.7188		104.506	65.2424	38.2439	20.6431	9.95519
5		110.717	61.44	31.5131	14.58	5.85938		94.0551	52.1939	26.7707	12.3859	4.9776
μ=	0.4	AE						AEw
Year (n)	D=	0.9	0.8	0.7	0.6	0.5		0.9	0.8	0.7	0.6	0.5
0		190	190	190	190	190		161.407	161.407	161.407	161.407	161.407
1		171	152	133	114	95		145.266	129.125	112.985	96.8441	80.7034
2		153.9	121.6	93.1	68.4	47.5		130.74	103.3	79.0894	58.1065	40.3517
3		138.51	97.28	65.17	41.04	23.75		117.666	82.6403	55.3626	34.8639	20.1759
4		124.659	77.824	45.619	24.624	11.875		105.899	66.1123	38.7538	20.9183	10.0879
5		112.193	62.2592	31.9333	14.7744	5.9375		95.3091	52.8898	27.1277	12.551	5.04396
μ=	0.3	AE						AEw
Year (n)	D=	0.9	0.8	0.7	0.6	0.5		0.9	0.8	0.7	0.6	0.5
0		192.5	192.5	192.5	192.5	192.5		163.531	163.531	163.531	163.531	163.531
1		173.25	154	134.75	115.5	96.25		147.178	130.825	114.471	98.1184	81.7653
2		155.925	123.2	94.325	69.3	48.125		132.46	104.66	80.13	58.871	40.8827
3		140.333	98.56	66.0275	41.58	24.0625		119.214	83.7277	56.091	35.3226	20.4413
4		126.299	78.848	46.2192	24.948	12.0312		107.292	66.9821	39.2637	21.1936	10.2207
5		113.669	63.0784	32.3535	14.9688	6.01562		96.5632	53.5857	27.4846	12.7161	5.11033
μ=	0.2	AE						AEw
Year (n)	D=	0.9	0.8	0.7	0.6	0.5		0.9	0.8	0.7	0.6	0.5
0		195	195	195	195	195		165.654	165.654	165.654	165.654	165.654
1		175.5	156	136.5	117	97.5		149.089	132.524	115.958	99.3926	82.8272
2		157.95	124.8	95.55	70.2	48.75		134.18	106.019	81.1707	59.6356	41.4136
3		142.155	99.84	66.885	42.12	24.375		120.762	84.8151	56.8195	35.7814	20.7068
4		127.94	79.872	46.8195	25.272	12.1875		108.686	67.852	39.7736	21.4688	10.3534
5		115.146	63.8976	32.7736	15.1632	6.09375		97.8173	54.2816	27.8415	12.8813	5.1767
μ=	0.1	AE						AEw
Year (n)	D=	0.9	0.8	0.7	0.6	0.5		0.9	0.8	0.7	0.6	0.5
0		197.5	197.5	197.5	197.5	197.5		167.778	167.778	167.778	167.778	167.778
1		177.75	158	138.25	118.5	98.75		151	134.223	117.445	100.667	83.8891
2		159.975	126.4	96.775	71.1	49.375		135.9	107.378	82.2113	60.4001	41.9445
3		143.978	101.12	67.7425	42.66	24.6875		122.31	85.9024	57.5479	36.2401	20.9723
4		129.58	80.896	47.4197	25.596	12.3438		110.079	68.7219	40.2835	21.7441	10.4861
5		116.622	64.7168	33.1938	15.3576	6.17188		99.0713	54.9776	28.1985	13.0464	5.24307

## Sheet: Tier 4
P_x (Wh/day)	800
a_x (hours/day)	16
r_x (hours/day)	1
R_x = μ * (r_x / a_x)
AE = P_x * (1 - R_x) * D^n
μ = reliability coefficient (0.9–0.5)
D = annual degradation factor (0.9–0.5)
n = system age in years (1–5)
Weighting assumption: highest weight between 6:30pm and 10:30pm (4 hours)
AE^(w) uses ψ_x computed from weights: AE^(w) = P_x * ψ_x * (1 - R_x) * D^n												0.0523529
μ=	0.9	AE						AEw
Year (n)	D=	0.9	0.8	0.7	0.6	0.5		0.9	0.8	0.7	0.6	0.5
0		755	755	755	755	755		715.474	715.474	715.474	715.474	715.474
1		679.5	604	528.5	453	377.5		643.926	572.379	500.831	429.284	357.737
2		611.55	483.2	369.95	271.8	188.75		579.534	457.903	350.582	257.57	178.868
3		550.395	386.56	258.965	163.08	94.375		521.58	366.322	245.407	154.542	89.4342
4		495.356	309.248	181.275	97.848	47.1875		469.422	293.058	171.785	92.7254	44.7171
5		445.82	247.398	126.893	58.7088	23.5938		422.48	234.446	120.25	55.6352	22.3585
μ=	0.8	AE						AEw
Year (n)	D=	0.9	0.8	0.7	0.6	0.5		0.9	0.8	0.7	0.6	0.5
0		760	760	760	760	760		720.212	720.212	720.212	720.212	720.212
1		684	608	532	456	380		648.191	576.169	504.148	432.127	360.106
2		615.6	486.4	372.4	273.6	190		583.372	460.936	352.904	259.276	180.053
3		554.04	389.12	260.68	164.16	95		525.034	368.748	247.033	155.566	90.0265
4		498.636	311.296	182.476	98.496	47.5		472.531	294.999	172.923	93.3394	45.0132
5		448.772	249.037	127.733	59.0976	23.75		425.278	235.999	121.046	56.0037	22.5066
μ=	0.7	AE						AEw
Year (n)	D=	0.9	0.8	0.7	0.6	0.5		0.9	0.8	0.7	0.6	0.5
0		765	765	765	765	765		724.95	724.95	724.95	724.95	724.95
1		688.5	612	535.5	459	382.5		652.455	579.96	507.465	434.97	362.475
2		619.65	489.6	374.85	275.4	191.25		587.21	463.968	355.225	260.982	181.237
3		557.685	391.68	262.395	165.24	95.625		528.489	371.174	248.658	156.589	90.6187
4		501.917	313.344	183.676	99.144	47.8125		475.64	296.94	174.06	93.9535	45.3094
5		451.725	250.675	128.574	59.4864	23.9062		428.076	237.552	121.842	56.3721	22.6547
μ=	0.6	AE						AEw
Year (n)	D=	0.9	0.8	0.7	0.6	0.5		0.9	0.8	0.7	0.6	0.5
0		770	770	770	770	770		729.688	729.688	729.688	729.688	729.688
1		693	616	539	462	385		656.719	583.751	510.782	437.813	364.844
2		623.7	492.8	377.3	277.2	192.5		591.047	467	357.547	262.688	182.422
3		561.33	394.24	264.11	166.32	96.25		531.943	373.6	250.283	157.613	91.211
4		505.197	315.392	184.877	99.792	48.125		478.748	298.88	175.198	94.5676	45.6055
5		454.677	252.314	129.414	59.8752	24.0625		430.874	239.104	122.639	56.7406	22.8028
μ=	0.5	AE						AEw
Year (n)	D=	0.9	0.8	0.7	0.6	0.5		0.9	0.8	0.7	0.6	0.5
0		775	775	775	775	775		734.426	734.426	734.426	734.426	734.426
1		697.5	620	542.5	465	387.5		660.984	587.541	514.099	440.656	367.213
2		627.75	496	379.75	279	193.75		594.885	470.033	359.869	264.394	183.607
3		564.975	396.8	265.825	167.4	96.875		535.397	376.026	251.908	158.636	91.8033
4		508.478	317.44	186.077	100.44	48.4375		481.857	300.821	176.336	95.1817	45.9017
5		457.63	253.952	130.254	60.264	24.2188		433.671	240.657	123.435	57.109	22.9508
μ=	0.4	AE						AEw
Year (n)	D=	0.9	0.8	0.7	0.6	0.5		0.9	0.8	0.7	0.6	0.5
0		780	780	780	780	780		739.165	739.165	739.165	739.165	739.165
1		702	624	546	468	390		665.248	591.332	517.415	443.499	369.582
2		631.8	499.2	382.2	280.8	195		598.723	473.065	362.191	266.099	184.791
3		568.62	399.36	267.54	168.48	97.5		538.851	378.452	253.533	159.66	92.3956
4		511.758	319.488	187.278	101.088	48.75		484.966	302.762	177.473	95.7957	46.1978
5		460.582	255.59	131.095	60.6528	24.375		436.469	242.209	124.231	57.4774	23.0989
μ=	0.3	AE						AEw
Year (n)	D=	0.9	0.8	0.7	0.6	0.5		0.9	0.8	0.7	0.6	0.5
0		785	785	785	785	785		743.903	743.903	743.903	743.903	743.903
1		706.5	628	549.5	471	392.5		669.513	595.122	520.732	446.342	371.951
2		635.85	502.4	384.65	282.6	196.25		602.561	476.098	364.512	267.805	185.976
3		572.265	401.92	269.255	169.56	98.125		542.305	380.878	255.159	160.683	92.9879
4		515.039	321.536	188.478	101.736	49.0625		488.075	304.703	178.611	96.4098	46.4939
5		463.535	257.229	131.935	61.0416	24.5312		439.267	243.762	125.028	57.8459	23.247
μ=	0.2	AE						AEw
Year (n)	D=	0.9	0.8	0.7	0.6	0.5		0.9	0.8	0.7	0.6	0.5
0		790	790	790	790	790		748.641	748.641	748.641	748.641	748.641
1		711	632	553	474	395		673.777	598.913	524.049	449.185	374.321
2		639.9	505.6	387.1	284.4	197.5		606.399	479.13	366.834	269.511	187.16
3		575.91	404.48	270.97	170.64	98.75		545.759	383.304	256.784	161.706	93.5801
4		518.319	323.584	189.679	102.384	49.375		491.183	306.643	179.749	97.0239	46.7901
5		466.487	258.867	132.775	61.4304	24.6875		442.065	245.315	125.824	58.2143	23.395
μ=	0.1	AE						AEw
Year (n)	D=	0.9	0.8	0.7	0.6	0.5		0.9	0.8	0.7	0.6	0.5
0		795	795	795	795	795		753.379	753.379	753.379	753.379	753.379
1		715.5	636	556.5	477	397.5		678.041	602.704	527.366	452.028	376.69
2		643.95	508.8	389.55	286.2	198.75		610.237	482.163	369.156	271.217	188.345
3		579.555	407.04	272.685	171.72	99.375		549.214	385.73	258.409	162.73	94.1724
4		521.6	325.632	190.879	103.032	49.6875		494.292	308.584	180.886	97.638	47.0862
5		469.44	260.506	133.616	61.8192	24.8438		444.863	246.867	126.62	58.5828	23.5431

## Sheet: Tier 5
P_x (Wh/day)	2000
a_x (hours/day)	22
r_x (hours/day)	1
R_x = μ * (r_x / a_x)
AE = P_x * (1 - R_x) * D^n
μ = reliability coefficient (0.9–0.5)
D = annual degradation factor (0.9–0.5)
n = system age in years (1–5)
Weighting assumption: highest weight between 6:30pm and 10:30pm (4 hours)
AE^(w) uses ψ_x computed from weights: AE^(w) = P_x * ψ_x * (1 - R_x) * D^n												0.0285714
μ=	0.9	AE						AEw
Year (n)	D=	0.9	0.8	0.7	0.6	0.5		0.9	0.8	0.7	0.6	0.5
0		1918.18	1918.18	1918.18	1918.18	1918.18		1863.38	1863.38	1863.38	1863.38	1863.38
1		1726.36	1534.55	1342.73	1150.91	959.091		1677.04	1490.7	1304.36	1118.03	931.688
2		1553.73	1227.64	939.909	690.545	479.545		1509.34	1192.56	913.055	670.816	465.844
3		1398.35	982.109	657.936	414.327	239.773		1358.4	954.049	639.138	402.489	232.922
4		1258.52	785.687	460.555	248.596	119.886		1222.56	763.239	447.397	241.494	116.461
5		1132.67	628.55	322.389	149.158	59.9432		1100.31	610.591	313.178	144.896	58.2305
μ=	0.8	AE						AEw
Year (n)	D=	0.9	0.8	0.7	0.6	0.5		0.9	0.8	0.7	0.6	0.5
0		1927.27	1927.27	1927.27	1927.27	1927.27		1872.21	1872.21	1872.21	1872.21	1872.21
1		1734.55	1541.82	1349.09	1156.36	963.636		1684.99	1497.77	1310.55	1123.32	936.104
2		1561.09	1233.45	944.364	693.818	481.818		1516.49	1198.21	917.382	673.995	468.052
3		1404.98	986.764	661.055	416.291	240.909		1364.84	958.57	642.167	404.397	234.026
4		1264.48	789.411	462.738	249.775	120.455		1228.36	766.856	449.517	242.638	117.013
5		1138.04	631.529	323.917	149.865	60.2273		1105.52	613.485	314.662	145.583	58.5065
μ=	0.7	AE						AEw
Year (n)	D=	0.9	0.8	0.7	0.6	0.5		0.9	0.8	0.7	0.6	0.5
0		1936.36	1936.36	1936.36	1936.36	1936.36		1881.04	1881.04	1881.04	1881.04	1881.04
1		1742.73	1549.09	1355.45	1161.82	968.182		1692.94	1504.83	1316.73	1128.62	940.519
2		1568.45	1239.27	948.818	697.091	484.091		1523.64	1203.86	921.709	677.174	470.26
3		1411.61	991.418	664.173	418.255	242.045		1371.28	963.092	645.196	406.304	235.13
4		1270.45	793.135	464.921	250.953	121.023		1234.15	770.474	451.637	243.783	117.565
5		1143.4	634.508	325.445	150.572	60.5114		1110.73	616.379	316.146	146.27	58.7825
μ=	0.6	AE						AEw
Year (n)	D=	0.9	0.8	0.7	0.6	0.5		0.9	0.8	0.7	0.6	0.5
0		1945.45	1945.45	1945.45	1945.45	1945.45		1889.87	1889.87	1889.87	1889.87	1889.87
1		1750.91	1556.36	1361.82	1167.27	972.727		1700.88	1511.9	1322.91	1133.92	944.935
2		1575.82	1245.09	953.273	700.364	486.364		1530.79	1209.52	926.036	680.353	472.468
3		1418.24	996.073	667.291	420.218	243.182		1377.72	967.614	648.225	408.212	236.234
4		1276.41	796.858	467.104	252.131	121.591		1239.94	774.091	453.758	244.927	118.117
5		1148.77	637.487	326.973	151.279	60.7955		1115.95	619.273	317.63	146.956	59.0584
μ=	0.5	AE						AEw
Year (n)	D=	0.9	0.8	0.7	0.6	0.5		0.9	0.8	0.7	0.6	0.5
0		1954.55	1954.55	1954.55	1954.55	1954.55		1898.7	1898.7	1898.7	1898.7	1898.7
1		1759.09	1563.64	1368.18	1172.73	977.273		1708.83	1518.96	1329.09	1139.22	949.351
2		1583.18	1250.91	957.727	703.636	488.636		1537.95	1215.17	930.364	683.532	474.675
3		1424.86	1000.73	670.409	422.182	244.318		1384.15	972.135	651.255	410.119	237.338
4		1282.38	800.582	469.286	253.309	122.159		1245.74	777.708	455.878	246.072	118.669
5		1154.14	640.465	328.5	151.985	61.0795		1121.16	622.166	319.115	147.643	59.3344
μ=	0.4	AE						AEw
Year (n)	D=	0.9	0.8	0.7	0.6	0.5		0.9	0.8	0.7	0.6	0.5
0		1963.64	1963.64	1963.64	1963.64	1963.64		1907.53	1907.53	1907.53	1907.53	1907.53
1		1767.27	1570.91	1374.55	1178.18	981.818		1716.78	1526.03	1335.27	1144.52	953.766
2		1590.55	1256.73	962.182	706.909	490.909		1545.1	1220.82	934.691	686.712	476.883
3		1431.49	1005.38	673.527	424.145	245.455		1390.59	976.657	654.284	412.027	238.442
4		1288.34	804.305	471.469	254.487	122.727		1251.53	781.325	457.999	247.216	119.221
5		1159.51	643.444	330.028	152.692	61.3636		1126.38	625.06	320.599	148.33	59.6104
μ=	0.3	AE						AEw
Year (n)	D=	0.9	0.8	0.7	0.6	0.5		0.9	0.8	0.7	0.6	0.5
0		1972.73	1972.73	1972.73	1972.73	1972.73		1916.36	1916.36	1916.36	1916.36	1916.36
1		1775.45	1578.18	1380.91	1183.64	986.364		1724.73	1533.09	1341.45	1149.82	958.182
2		1597.91	1262.55	966.636	710.182	493.182		1552.25	1226.47	939.018	689.891	479.091
3		1438.12	1010.04	676.645	426.109	246.591		1397.03	981.178	657.313	413.935	239.545
4		1294.31	808.029	473.652	255.665	123.295		1257.33	784.943	460.119	248.361	119.773
5		1164.88	646.423	331.556	153.399	61.6477		1131.59	627.954	322.083	149.016	59.8864
μ=	0.2	AE						AEw
Year (n)	D=	0.9	0.8	0.7	0.6	0.5		0.9	0.8	0.7	0.6	0.5
0		1981.82	1981.82	1981.82	1981.82	1981.82		1925.19	1925.19	1925.19	1925.19	1925.19
1		1783.64	1585.45	1387.27	1189.09	990.909		1732.68	1540.16	1347.64	1155.12	962.597
2		1605.27	1268.36	971.091	713.455	495.455		1559.41	1232.12	943.345	693.07	481.299
3		1444.75	1014.69	679.764	428.073	247.727		1403.47	985.7	660.342	415.842	240.649
4		1300.27	811.753	475.835	256.844	123.864		1263.12	788.56	462.239	249.505	120.325
5		1170.24	649.402	333.084	154.106	61.9318		1136.81	630.848	323.567	149.703	60.1623
μ=	0.1	AE						AEw
Year (n)	D=	0.9	0.8	0.7	0.6	0.5		0.9	0.8	0.7	0.6	0.5
0		1990.91	1990.91	1990.91	1990.91	1990.91		1934.03	1934.03	1934.03	1934.03	1934.03
1		1791.82	1592.73	1393.64	1194.55	995.455		1740.62	1547.22	1353.82	1160.42	967.013
2		1612.64	1274.18	975.545	716.727	497.727		1566.56	1237.78	947.673	696.249	483.506
3		1451.37	1019.35	682.882	430.036	248.864		1409.9	990.221	663.371	417.75	241.753
4		1306.24	815.476	478.017	258.022	124.432		1268.91	792.177	464.36	250.65	120.877
5		1175.61	652.381	334.612	154.813	62.2159		1142.02	633.742	325.052	150.39	60.4383
